# Supplementary figures and images for: Patient-derived glioblastoma cells show significant heterogeneity in treatment responses to the inhibitor-of-apoptosis-protein antagonist birinapant
Source: PubMed Central journal article supplement — Br J Cancer. 2015 Dec 10;114(2):188–98. doi: 10.1038/bjc.2015.420 (PMC4815807; doi:10.1038/bjc.2015.420), 2015-12-10

# Supplementary Figure 2

**A**

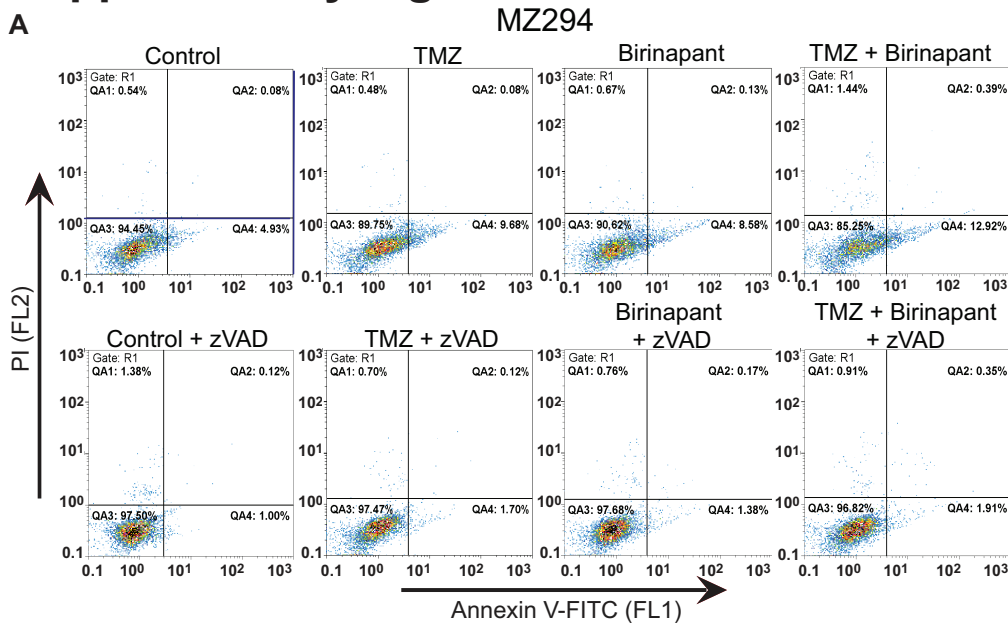

**B**

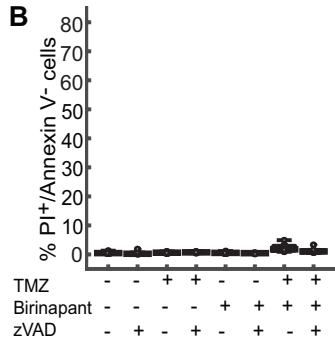

**C**

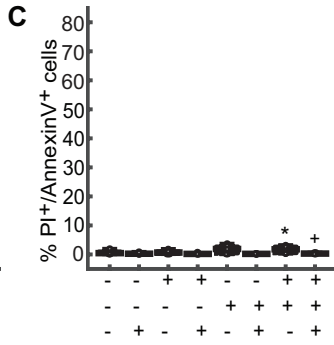

**D**

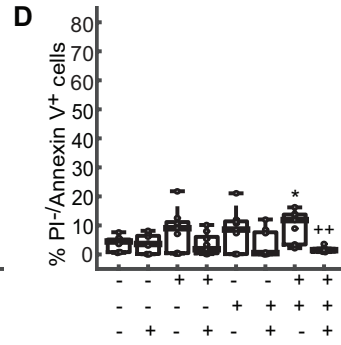

**G**

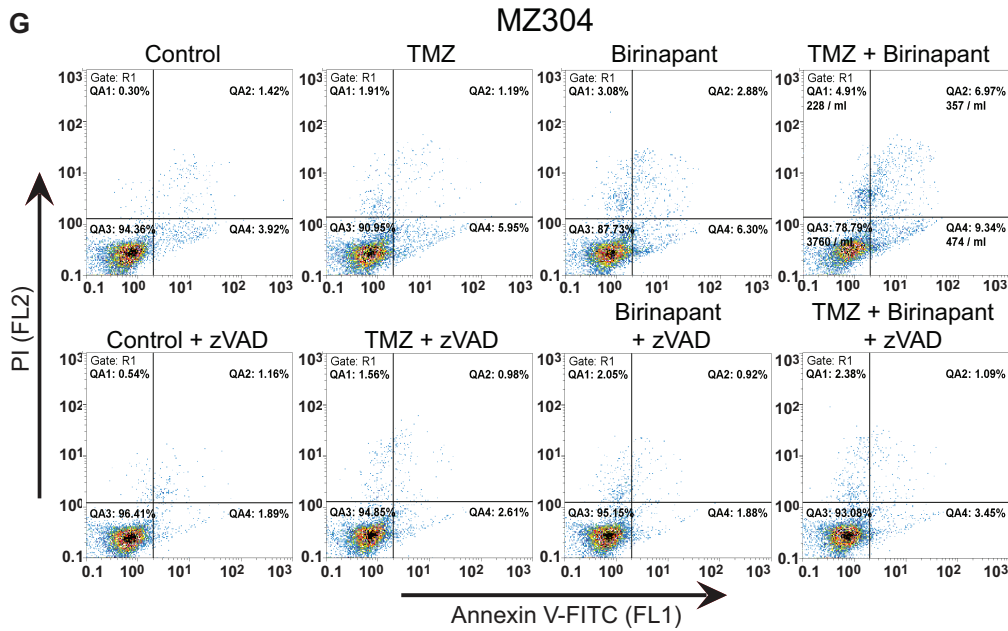

**H**

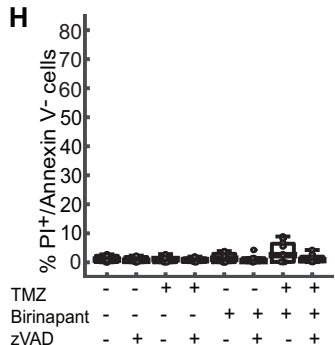

**I**

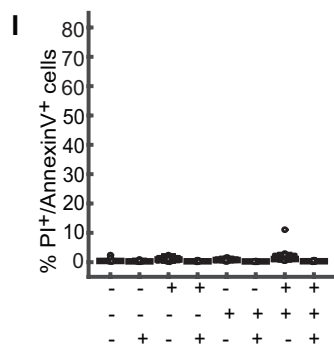

**J**

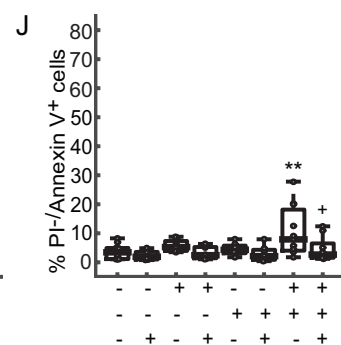

**E**

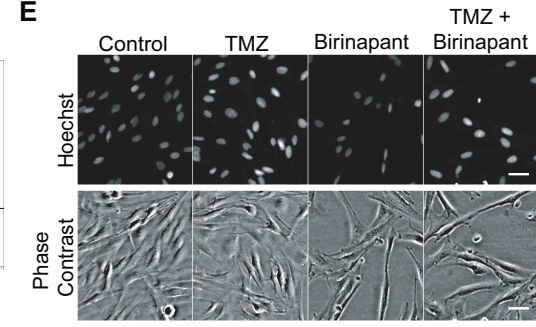

**F**

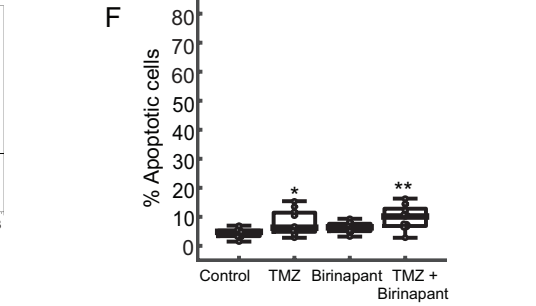

**K**

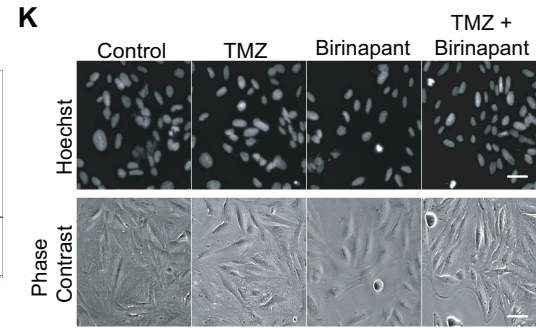

**L**

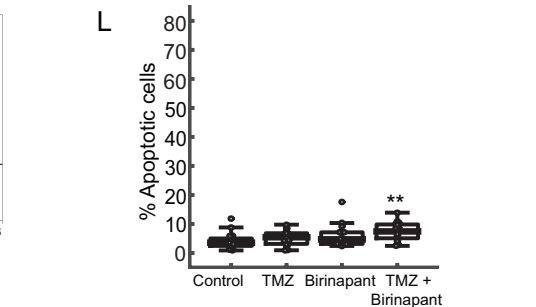

Supplement: bjc2015420x3.pdf [file bjc2015420x3.pdf]
